# Supplementary material for: Influence of manganese ions in the band gap of tin oxide nanoparticles: structure, microstructure and optical studies
Source: Royal Society of Chemistry journal article supplement (doi:10.1039/c3ra46378h), 2013-11-21
Supplement: c3ra46378h.pdf [file c3ra46378h.pdf]

## Influence of Manganese ions in the band gap of tin oxide nanoparticles: Structure, microstructure and optical studies

Boya Venugopal<sup>a</sup>, Brajesh Nandan<sup>a</sup>, Amutha Ayyachamy<sup>a</sup>, Sankarakumar Amirthapandian<sup>b</sup>,  
Binaya Kumar Panigrahi<sup>b</sup> and Thangadurai Paramasivam<sup>a</sup>

<sup>a</sup> Centre for Nanoscience and Technology, Pondicherry University, RV Nagar, Kalapet,  
Pondicherry 605 014, India. Tel: +91-(0)413-2654974; E-mail:  
thangaduraip.nst@pondiuni.edu.in

<sup>b</sup> Materials Physics Division, Materials Science Group, Indira Gandhi Centre for Atomic  
Research, Kalpakkam, Tamilnadu – 602103, India

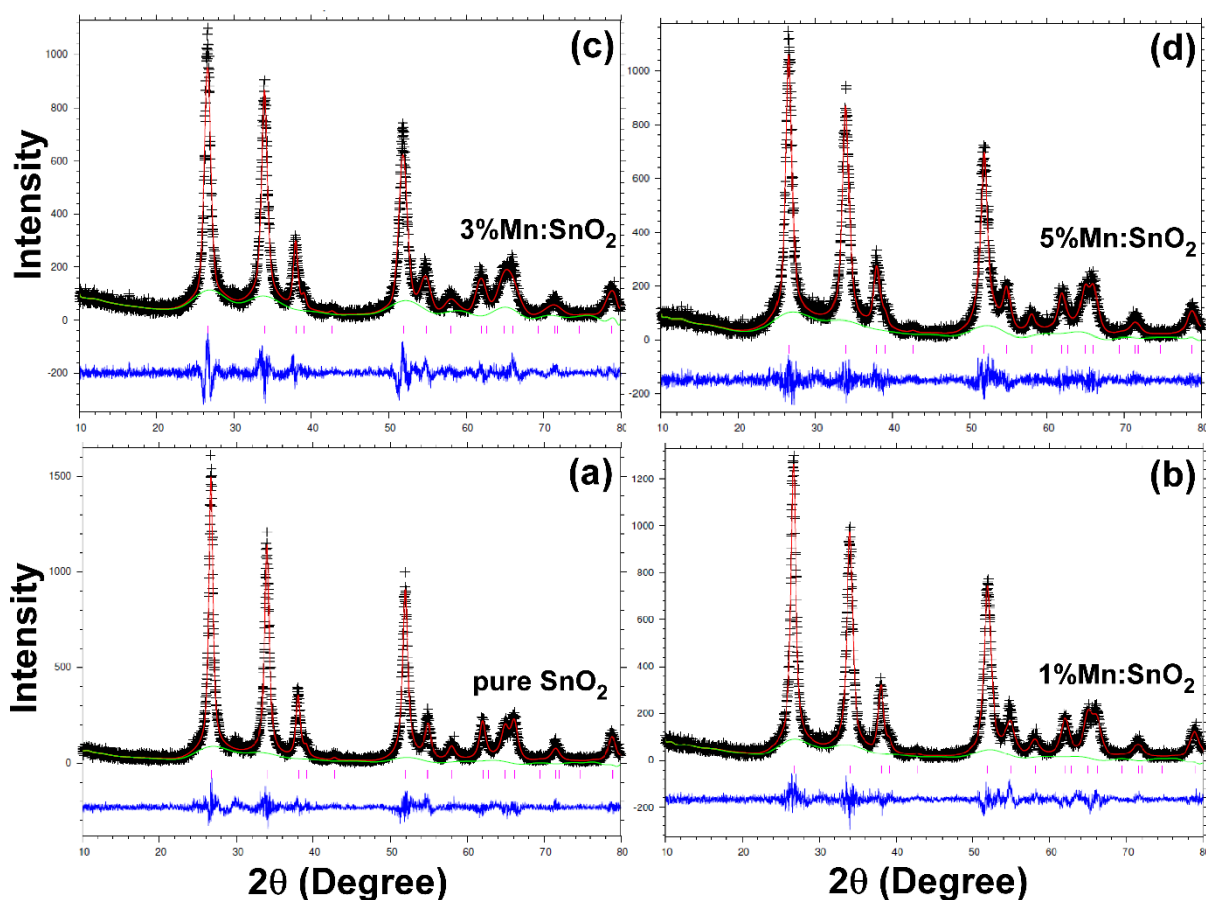

Figure 1. The Rietveld refined XRD patterns of pure, 1 mol% and 3 mol% Mn ion doped  $\text{SnO}_2$  nanoparticles. The tick marks represents the calculated peak positions of tetragonal phase.

Table 1: Lattice parameters and the unit cell volume of the pure and Mn ion doped SnO<sub>2</sub> nanoparticles obtained from the Rietveld Analysis of the XRD patterns. Number in the bracket is the standard deviation in the calculated data. The refinement parameters are also provided.

|           | $a = b$<br>(Å)      | $c$<br>(Å)          | $c/a$  | Unit cell volume<br>(Å <sup>3</sup> ) | $\chi^2$ | $R_{wp}$ | $R_p$ | $R_F^2$ | $R_{exp}$ |
|-----------|---------------------|---------------------|--------|---------------------------------------|----------|----------|-------|---------|-----------|
| Pure      | 4.7391<br>(±0.0007) | 3.1849<br>(±0.0005) | 0.6720 | 71.5300<br>(±0.0300)                  | 2.948    | 0.167    | 0.114 | 0.066   | 0.098     |
| 1 %<br>Mn | 4.7392<br>(±0.0008) | 3.1824<br>(±0.0006) | 0.6715 | 71.4750<br>(±0.0340)                  | 2.278    | 0.144    | 0.101 | 0.045   | 0.096     |
| 3 %<br>Mn | 4.7397<br>(±0.0011) | 3.1802<br>(±0.0009) | 0.6709 | 71.4430<br>(±0.0480)                  | 2.987    | 0.165    | 0.126 | 0.074   | 0.096     |
| 5 %<br>Mn | 4.7370<br>(±0.0010) | 3.1794<br>(±0.0007) | 0.6712 | 71.3440<br>(±0.0420)                  | 2.53     | 0.147    | 0.106 | 0.042   | 0.093     |

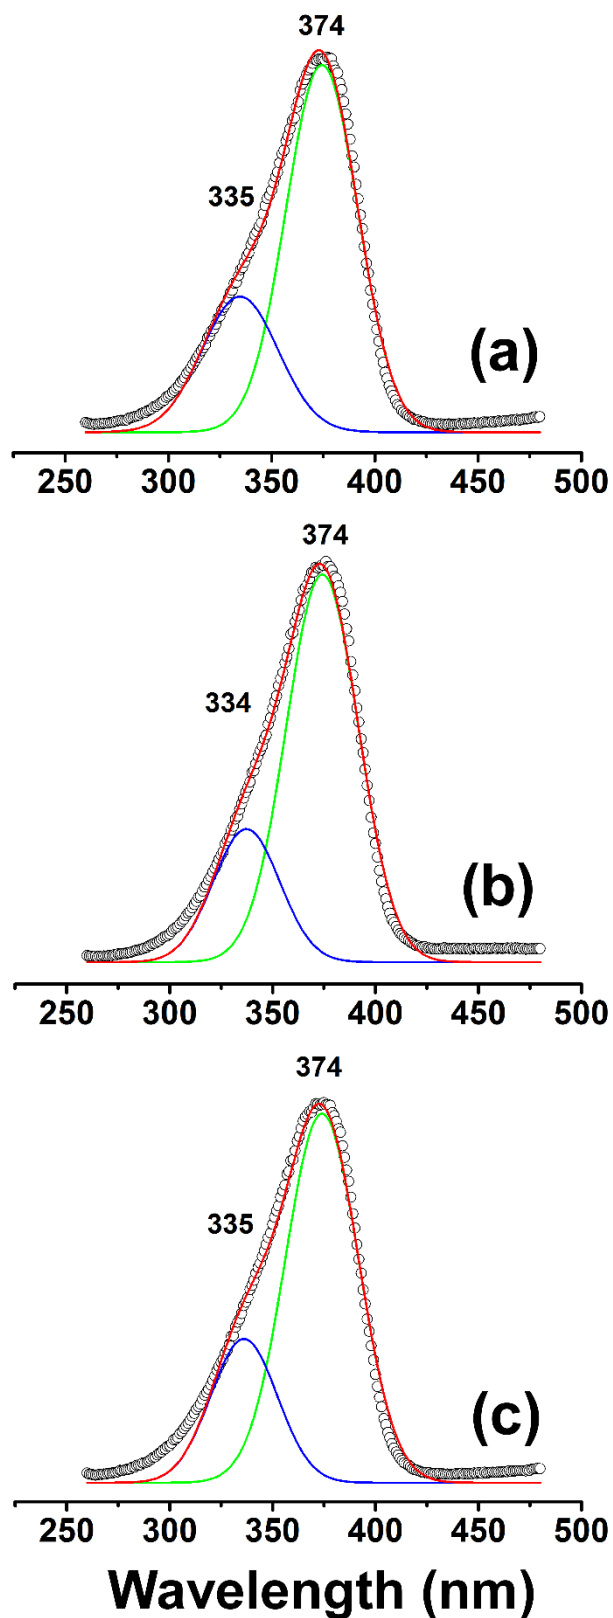

Figure 2. Deconvoluted room temperature PL spectra of (a) pure SnO<sub>2</sub> (b) 1 mol% and (c) 3 mol% Mn ions doped SnO<sub>2</sub> nanoparticles. Two components corresponding to the near band edge emission (335 nm) and due to defects/surface state (375 nm) are observed. The excitation wavelength  $\lambda_{\text{ex}} = 250$  nm.
